## Retraction

## Retraction: Ursolic acid inhibits the growth of human pancreatic cancer and enhances the antitumor potential of gemcitabine in an orthotopic mouse model through suppression of the inflammatory microenvironment

Sahdeo Prasad<sup>1</sup>, Vivek R. Yadav<sup>1</sup>, Bokyung Sung<sup>1</sup>, Subash C. Gupta<sup>1</sup>, Amit K. Tyagi<sup>1</sup> and Bharat B. Aggarwal<sup>1,2</sup>

<sup>1</sup>Department of Experimental Therapeutics, Cytokine Research Laboratory, The University of Texas MD Anderson Cancer Center, Houston, TX, USA

<sup>2</sup>Anti-inflammatory Research Institute, San Deigo, CA, USA

**Published:**

**Copyright:** © 2025 Prasad et al. This is an open access article distributed under the terms of the [Creative Commons Attribution License](#) (CC BY 4.0), which permits unrestricted use, distribution, and reproduction in any medium, provided the original author and source are credited.

**This article has been retracted:** Oncotarget's Image Forensics investigation of this paper has found image anomalies. In Figure 6A, there are several areas of internal image duplication and overlap. In addition, according to the data in Figure 3C, there are concerns involving animal experiment ethics with regard to tumor sizes. Though corresponding author Sahdeo Prasad has provided a new file to address the concerns in Figure 6A, no response to the ethics issues has been offered despite the journal's repeated requests for more information. Therefore, the Editorial decision has been made to retract this paper.

Original article: Oncotarget. 2016; 7:13182–13196. <https://doi.org/10.18632/oncotarget.7537>
